# Supplementary material for: In Silico Knockout Screening of Plasmodium falciparum Reactions and Prediction of Novel Essential Reactions by Analysing the Metabolic Network
Source: Hindawi journal article supplement (doi:10.1155/2018/8985718), 2018-01-01
Supplement: f1 [file 8985718.f1.pdf]

## Appendix A. Supplementary material

Table S1: The gold standard

| Enzyme Commission No. | Reaction                                                                                              | Reference         |
|-----------------------|-------------------------------------------------------------------------------------------------------|-------------------|
| None                  | histone deacetylase                                                                                   | [71], [72]        |
| 1.1.1.205             | IMP dehydrogenase                                                                                     | [73]              |
| 1.1.1.267             | 1-deoxy-D-xylulose 5-phosphate reductoisomerase                                                       | [74]–[76]         |
| 1.1.1.27              | lactate dehydrogenase                                                                                 | [77], [78]        |
| 1.10.2.2              | mitochondrial ubiquinol-cytochrome C reductase                                                        | [79]              |
| 1.15.1.1              | superoxide dismutase                                                                                  | [80]              |
| 1.17.1.2              | 4-hydroxy-3-methylbut-2-enyl diphosphate reductase                                                    | [81]              |
| 1.17.4.1              | Ribonucleoside-diphosphate reductase                                                                  | [82], [83]        |
| 1.2.4.4               | 3-Methyl-2-oxobutanoate dehydrogenase (lipoamide)                                                     | [84]              |
| 1.3.1.9               | enoyl-ACP-reductase                                                                                   | [85], [86]        |
| 1.3.3.1               | Dihydroorotate oxidase                                                                                | [87]–[93]         |
| 1.3.3.4               | Protoporphyrinogen oxidase                                                                            | [94], [95]        |
| 1.3.99.1              | Succinate dehydrogenase                                                                               | [96]              |
| 1.5.1.3               | Dihydrofolate reductase                                                                               | [97]–[99]         |
| 1.5.1.5, 3.5.4.9      | Methylenetetrahydrofolate dehydrogenase (NADP <sup>+</sup> ), methenyltetrahydrofolate cyclohydrolase | [99]              |
| 1.6.5.3               | NADH dehydrogenase (ubiquinone)                                                                       | [100]             |
| 1.6.99.3              | NADH dehydrogenase                                                                                    | [101], [102]      |
| 1.8.1.7               | glutathione reductase                                                                                 | [103]–[106]       |
| 1.8.1.9               | thioredoxin reductase                                                                                 | [107]             |
| 2.1.1.100             | Protein-S-isoprenylcysteine-O-methyltransferase                                                       | [108], [109]      |
| 2.1.1.103             | phosphoethanolamine N-methyltransferase                                                               | [110]             |
| 2.1.1.45              | Thymidylate synthase                                                                                  | [98], [111]       |
| 2.1.1.64              | 3-Demethylubiquinone-9,3-O-methyltransferase                                                          | [99]              |
| 2.1.3.2               | aspartate carbamoyltransferase                                                                        | [112]             |
| 2.2.1.7               | 1-deoxy-D-xylulose-5-phosphate synthase                                                               | [74], [113]       |
| 2.3.1.15              | Glycerol-3-phosphate-O-acyltransferase                                                                | [114]–[116]       |
| 2.3.1.24              | sphingosine N-acyltransferase                                                                         | [117]             |
| 2.3.1.37              | 5-aminolevulinic acid synthase                                                                        | [118], [119]      |
| 2.3.1.41              | 3-Oxoacyl-[acyl-carrier protein] synthase                                                             | [85], [120]–[122] |
| 2.3.1.50              | serine C-palmitoyltransferase                                                                         | [117]             |
| 2.4.2.1               | Purine-nucleoside phosphorylase                                                                       | [123], [124]      |
| 2.4.2.10              | orotate phosphoribosyltransferase                                                                     | [125], [126]      |

|                    |                                                              |                            |
|--------------------|--------------------------------------------------------------|----------------------------|
| 2.4.2.8            | Hypoxanthine phosphoribosyltransferase                       | [127], [128]               |
| 2.5.1.10, 2.5.1.1  | Geranyltranstransferase, dimethylallyltranstransferase       | [129]                      |
| 2.5.1.15           | Dihydropteroate synthase                                     | [130]                      |
| 2.5.1.16           | Spermidine synthase                                          | [131]                      |
| 2.5.1.18           | Glutathione transferase                                      | [132]–[135]                |
| 2.5.1.19           | 3-Phosphoshikimate 1-carboxyvinyltransferase                 | [136]                      |
| 2.5.1.21           | Farnesyl-diphosphate farnesyltransferase                     | [137]                      |
| 2.5.1.46           | deoxyhypusine synthase                                       | [138]                      |
| 2.5.1.58           | protein farnesyltransferase                                  | [139]                      |
| 2.7.1.32           | Choline kinase                                               | [140], [141]               |
| 2.7.8.3            | sphingomyelin synthase/phosphatidic acid phosphatase         | [117]                      |
| 3.1.1.31, 1.1.1.49 | 6-phosphogluconolactonase, glucose-6-phosphate dehydrogenase | [142], [143]               |
| 3.1.1.5            | Lysophospholipase                                            | [144]                      |
| 3.1.3.56           | Inositol-1,4,5-trisphosphate 5-phosphatase                   | [145]                      |
| 3.1.4.12           | Sphingomyelin phosphodiesterase                              | [146]                      |
| 3.1.4.17           | 3',5'-Cyclic-nucleotide phosphodiesterase                    | [147], [148]               |
| 3.3.1.1            | S-adenosyl-l-homocysteine hydrolase                          | [149]–[151]                |
| 3.5.2.3            | Dihydroorotase                                               | [152], [153]               |
| 3.5.4.4            | Adenosine deaminase                                          | [154], [155]               |
| 3.6.1.17           | Bis(5'-nucleosyl)-tetrphosphatase (asymmetrical)             | [156]                      |
| 4.1.1.17           | Ornithine decarboxylase                                      | [157]–[159]                |
| 4.1.1.23           | Orotidine-5'-phosphate decarboxylase                         | [126], [160]–[162]         |
| 4.1.1.50           | Adenosylmethionine decarboxylase                             | [158], [159], [163], [164] |
| 4.1.2.13           | Fructose-bisphosphate aldolase                               | [165]                      |
| 4.2.1.1            | carbonate dehydratase                                        | [166]                      |
| 4.2.1.11           | Phosphopyruvate hydratase / enolase                          | [167]                      |
| 4.2.1.24           | Delta-aminolevulinic acid dehydratase                        | [95], [168]                |
| 4.2.1.58 – 61      | 3-hydroxyacyl-ACP dehydratase                                | [85], [169]                |
| 4.2.3.5            | Chorismate synthase                                          | [90]                       |
| 4.3.2.2            | adenylosuccinate lyase                                       | [170]                      |
| 4.4.1.5            | Lactoylglutathione lyase                                     | [171], [172]               |
| 4.6.1.12           | 2C-methyl-D-erythritol 2,4-cyclodiphosphate synthase         | [173]                      |
| 5.3.1.1            | triosephosphate isomerase                                    | [174]                      |
| 5.99.1.2           | topoisomerase I                                              | [175]                      |
| 5.99.1.3           | topoisomerase II                                             | [176]–[178]                |
| 6.1.1.3            | Threonine-tRNA ligase                                        | [179]                      |

|          |                                                      |                     |
|----------|------------------------------------------------------|---------------------|
| 6.1.1.7  | Alanine-tRNA ligase                                  | [180]               |
| 6.3.2.12 | dihydrofolate synthase                               | [181]               |
| 6.3.2.17 | folylpolyglutamate synthase                          | [181]               |
| 6.3.2.2  | Gamma-glutamylcysteine synthetase                    | [105], [182], [183] |
| 6.3.5.5  | Carbamoyl-phosphate synthase (glutamine-hydrolysing) | [184]               |
| 6.3.4.4  | adenylosuccinate synthase                            | [185]               |
| 6.3.5.2  | GMP synthase                                         | [186]               |
| 6.3.5.5  | carbamoyl phosphate synthetase                       | [184]               |
| 6.4.1.2  | Acetyl-CoA carboxylase                               | [120]               |

**Table S2: Knocked out reactions for reactions a-g**

|    | Reaction           | Knocked Out Reaction                                                                                                                                                                                                                                                                                                                                                                                                                                                                                                                                                                                                                                                                                                                                                                                                                                                                                                                                                                                                                                                                                                                                                                                                                                                                                                                                                                                                                                                                                                                                                                                                                                                                                                                                                                    |
|----|--------------------|-----------------------------------------------------------------------------------------------------------------------------------------------------------------------------------------------------------------------------------------------------------------------------------------------------------------------------------------------------------------------------------------------------------------------------------------------------------------------------------------------------------------------------------------------------------------------------------------------------------------------------------------------------------------------------------------------------------------------------------------------------------------------------------------------------------------------------------------------------------------------------------------------------------------------------------------------------------------------------------------------------------------------------------------------------------------------------------------------------------------------------------------------------------------------------------------------------------------------------------------------------------------------------------------------------------------------------------------------------------------------------------------------------------------------------------------------------------------------------------------------------------------------------------------------------------------------------------------------------------------------------------------------------------------------------------------------------------------------------------------------------------------------------------------|
| a. | SUPEROX-DISMUT-RXN | 'RXN-10696', 'RXN-11026', 'PROTOPORGENOXI-RXN', 'RXN-3761', 'THIOL-OXIDASE-RXN', 'L-ASPARTATE-OXID-RXN', 'RXN66-2', 'GLUTATHIONE-PEROXIDASE-RXN', 'RXN-7650', 'DIHYDROOROTOX-RXN', 'RXN-10707', 'RXN-10706', 'RXN-744', 'PNPOXI-RXN', 'RXN30-1380', 'RXN0-1461', 'CYSTEINE-DIOXYGENASE-RXN', 'SARCOX-RXN', 'RXN-7141', 'PMPOXI-RXN', 'RXN-7686', 'ACYL-COA-OXIDASE-RXN-BUTYRYL-COA/OXYGEN-MOLECULE', 'RXN-1541', 'RXN66-1', 'CATAL-RXN', 'RXN0-3921', 'RXN-1321', 'RXN-10697', 'RXN-10695', 'RXN-3645', 'RXN-5502', 'QUINOLINATE-SYNTHA-RXN', 'RXN-10705', 'RXN-10700', 'RXN-10704', 'RXN-10699', 'PNKIN-RXN', 'PROTOPORGENOXI-RXN', 'UROGENDECARBOX-RXN', '3-SULFINOALANINE-AMINOTRANSFERASE-RXN', 'N-CARBAMOYLSARCOSINE-AMIDASE-RXN', 'R10-RXN', 'RXN-2881', 'CREATINASE-RXN', 'RXN-7224', 'RXN-7226', 'RXN-7779', 'RXN-7142', 'PYRAMKIN-RXN', 'RXN-3303', 'RXN-5501', 'RXN0-3922-GAMMA-GLUTAMYL-GAMMA-AMINOBUTYRALDEH/NAD/WATER', 'RXN0-3922-GAMMA-GLUTAMYL-GAMMA-AMINOBUTYRALDEH/NADP/WATER', 'RXN0-3901', 'RXN1F-19', 'L-ASPARTATE-OXID-RXN', 'QUINOPRIBOTRANS-RXN', 'RXN-10707', 'RXN-10703', 'RXN-10702', 'RXN-10707', 'RXN-10706', 'RXN-10698', 'RXN0-1461', 'UROGENIIISYN-RXN', 'CYSTEINE-DIOXYGENASE-RXN', '3-SULFINYL-PYRUVATE-SPON-RXN', '3.5.2.14-RXN', 'R12-RXN', 'CREATININASE-RXN', 'RXN-7225', 'RXN-7227', 'RXN-7141', 'RXN-3645', 'RXN-7781', 'RXN-7143', 'RXN-7780', 'RXN-3642', 'RXN-1321', 'ALLENE-OXIDE-CYCLASE-RXN', 'RXN-10705', 'RXN-10701', 'OHMETHYLBILANESYN-RXN', 'UROGENDECARBOX-RXN', 'N-CARBAMOYLSARCOSINE-AMIDASE-RXN', 'CREATININE-DEAMINASE-RXN', 'RXN1F-19', '12-OXOPHYTODIENOATE-REDUCTASE-RXN', 'PORPHOBILSYNTH-RXN', 'UROGENIIISYN-RXN', '5-AMINOLEVULINIC-ACID-SYNTHASE-RXN', 'GSAAMINOTRANS-RXN', 'OHMETHYLBILANESYN-RXN', 'GLUTRNAREDUCT-RXN' |
| b. | CATAL-RXN          | 'CYSTEINE-DIOXYGENASE-RXN', 'RXN-7650', 'RXN66-2', 'RXN-3761', 'RXN-7141', 'RXN-1321', 'RXN-1541', 'RXN-744', 'RXN30-1380', 'THIOL-OXIDASE-RXN', 'RXN-7686', 'RXN0-1461', '3-SULFINOALANINE-AMINOTRANSFERASE-RXN', 'RXN-3645', 'RXN-5502', 'RXN-7142', 'RXN-7226', 'RXN-7779', 'RXN-7224', 'RXN1F-19', 'RXN-3303', 'RXN-5501', 'UROGENDECARBOX-RXN', 'PROTOPORGENOXI-RXN', 'CYSTEINE-DIOXYGENASE-RXN', '3-SULFINYL-PYRUVATE-SPON-RXN', 'RXN-7227', 'RXN-7225', 'ALLENE-OXIDE-CYCLASE-RXN', 'RXN-1321', 'RXN-7780', 'RXN-3645', 'RXN-7143', 'RXN-3642', 'RXN-7781', 'RXN-7141', 'UROGENIIISYN-RXN', 'RXN0-1461', 'RXN1F-19', '12-OXOPHYTODIENOATE-REDUCTASE-RXN', 'UROGENDECARBOX-RXN', 'OHMETHYLBILANESYN-RXN', 'ALLENE-OXIDE-CYCLASE-RXN', 'RXN-10695', 'RXN-744', 'UROGENIIISYN-RXN', 'PORPHOBILSYNTH-RXN', 'RXN-10696', '5-AMINOLEVULINIC-ACID-SYNTHASE-RXN', 'GSAAMINOTRANS-RXN', 'OHMETHYLBILANESYN-RXN', 'RXN-10697', 'RXN-10695', 'GLUTRNAREDUCT-RXN', 'RXN-10696', 'RXN-10698', 'RXN-10699', 'RXN-10697', 'RXN-10698', 'RXN-10706', 'RXN-10699', 'RXN-10704', 'RXN-10706', 'RXN-10702', 'RXN-10704', 'RXN-10700', 'RXN-10702', 'RXN-10707', 'RXN-10705', 'RXN-10700', 'RXN-10703', 'RXN-10707', 'RXN-10705', 'RXN-10701'                                                                                                                                                                                                                                                                                                                                                                                                                                                                                                                                                        |
| c. | S-ADENMETSYN-RXN   | 'RXN-5501', 'RXN-5762', 'ADOMET-DMK-METHYLTRANSFER-RXN', 'DIPHTHINE-SYNTHASE-RXN', 'SAMDECARB-RXN', 'RXN-5763', 'RXN1F-28', 'RXN-3645', '2.1.1.71-RXN', '2-OCTAPRENYL-6-OHPHENOL-METHY-RXN', '2.1.1.5-RXN', '2.1.1.62-RXN', '2.1.1.137-RXN', 'RXN-5643', 'HOMOCYMET-RXN', '2.1.1.77-RXN', 'RXN-5642', 'FORMYLMETHIONINE-DEFORMYLASE-RXN', 'RXN-5761', '2.1.1.138-RXN', 'RXN-3642', '2.1.1.103-RXN', '2-OCTAPRENYL-METHOXY-BENZOQ-METH-RXN', 'PYRIMSINI-RXN', 'HOMOCYMETB12-RXN', 'RXN-5502', 'DMK-RXN',                                                                                                                                                                                                                                                                                                                                                                                                                                                                                                                                                                                                                                                                                                                                                                                                                                                                                                                                                                                                                                                                                                                                                                                                                                                                                 |

|    |                              |                                                                                                                                                                                                                                                                                                                                                                                                                                                                                                                                                                                                                                                                                                                                                                                                                                                                                                                                                                                                                                                                                                                                                                                                                 |
|----|------------------------------|-----------------------------------------------------------------------------------------------------------------------------------------------------------------------------------------------------------------------------------------------------------------------------------------------------------------------------------------------------------------------------------------------------------------------------------------------------------------------------------------------------------------------------------------------------------------------------------------------------------------------------------------------------------------------------------------------------------------------------------------------------------------------------------------------------------------------------------------------------------------------------------------------------------------------------------------------------------------------------------------------------------------------------------------------------------------------------------------------------------------------------------------------------------------------------------------------------------------|
|    |                              | 'MALATE-DEHYDROGENASE-ACCEPTOR-RXN-<br>MAL/DEMETHYLMENAQUINONE', 'DLACTDEHYDROGFAD-RXN-D-<br>LACTATE/DEMETHYLMENAQUINONE', 'RXN0-5260-<br>DEMETHYLMENAQUINONE/GLYCEROL-3P', 'SPERMINE-SYNTHASE-RXN',<br>'RXN0-5217', 'SPERMIDINESYN-RXN', 'RXN-745', 'RXN4FS-3', 'RXN-5643', '2.7.7.57-<br>RXN', 'RXN-5642', 'RXN-9311', 'LYSDECARBOX-RXN', 'RXN-744', 'RXN-10708',<br>'RXN1F-28', 'NAPHTHOATE-SYN-RXN', 'DMK-RXN', 'RXN-9311', 'O-<br>SUCCINYLBENZOATE-COA-LIG-RXN', 'NAPHTHOATE-SYN-RXN', 'O-<br>SUCCINYLBENZOATE-COA-SYN-RXN'                                                                                                                                                                                                                                                                                                                                                                                                                                                                                                                                                                                                                                                                                |
| d. | 2.5.1.19-RXN                 | 'CHORISMATE-SYNTHASE-RXN', 'SHIKIMATE-KINASE-RXN', 'CHORPYRLY-<br>RXN', 'CHORISMATEMUT-RXN', 'ISOCHORSYN-RXN', 'PABASYN-RXN',<br>'ANTHRANSYN-RXN', '2.5.1.19-RXN', 'SHIKIMATE-5-DEHYDROGENASE-RXN',<br>'2.5.1.19-RXN', 'RXN-7968-SHIKIMATE/NAD', '4OHBENZOATE-<br>OCTAPRENYLTRANSFER-RXN', '2.5.1.39-RXN', 'PREPHENATEDEHYDRAT-RXN',<br>'PREPHENATEDEHYDROG-RXN', 'ISOCHORMAT-RXN', 'ADCLY-RXN',<br>'PRTRANS-RXN', '3-OCTAPRENYL-4-OHBENZOATE-DECARBOX-RXN',<br>'TYRAMINOTRANS-RXN', 'ORNITHINE--OXO-ACID-AMINOTRANSFERASE-<br>RXN-L-ORNITHINE/P-HYDROXY-PHENYLPYRUVATE', 'DHBDEHYD-RXN',<br>'ISOCHORSYN-RXN', 'PABASYN-RXN', 'RXN-6142', 'H2PTEROATESYNTH-RXN',<br>'PRAISOM-RXN', 'ANTHRANSYN-RXN', 'ISOCHORMAT-RXN', 'ENTMULTI-RXN',<br>'DIHYDROFOLATESYNTH-RXN', 'H2PTERIDINEPYROPHOSPHOKIN-RXN',<br>'IGPSYN-RXN', 'PRTRANS-RXN', 'H2NEOPTERINALDOL-RXN',<br>'H2PTEROATESYNTH-RXN', 'PRAISOM-RXN', 'RXN0-2381',<br>'DIHYDRONEOPTERIN-MONO-P-DEPHOS-RXN',<br>'H2PTERIDINEPYROPHOSPHOKIN-RXN', 'IGPSYN-RXN', 'RXN0-2382',<br>'H2NEOPTERINALDOL-RXN', 'H2NEOPTERINP3PYROPHOSPHOHYDRO-RXN',<br>'TRYPTOPHAN--TRNA-LIGASE-RXN', 'RXN0-2381', 'DIHYDRONEOPTERIN-<br>MONO-P-DEPHOS-RXN', 'GTP-CYCLOHYDRO-I-RXN'      |
| e. | CHORISMATE-SYNTHASE-RXN      | 'CHORPYRLY-RXN', '2.5.1.19-RXN', 'CHORISMATEMUT-RXN', 'ISOCHORSYN-<br>RXN', 'PABASYN-RXN', 'ANTHRANSYN-RXN', '4OHBENZOATE-<br>OCTAPRENYLTRANSFER-RXN', '2.5.1.39-RXN', 'SHIKIMATE-KINASE-RXN',<br>'CHORISMATE-SYNTHASE-RXN', 'PREPHENATEDEHYDRAT-RXN',<br>'PREPHENATEDEHYDROG-RXN', 'ISOCHORMAT-RXN', 'ADCLY-RXN',<br>'PRTRANS-RXN', 'TYRAMINOTRANS-RXN', 'ORNITHINE--OXO-ACID-<br>AMINOTRANSFERASE-RXN-L-ORNITHINE/P-HYDROXY-PHENYLPYRUVATE',<br>'ISOCHORSYN-RXN', 'DHBDEHYD-RXN', 'PABASYN-RXN', 'RXN-6142',<br>'H2PTEROATESYNTH-RXN', 'PRAISOM-RXN', 'ANTHRANSYN-RXN',<br>'ISOCHORMAT-RXN', 'ENTMULTI-RXN', 'DIHYDROFOLATESYNTH-RXN',<br>'H2PTERIDINEPYROPHOSPHOKIN-RXN', 'IGPSYN-RXN', 'PRTRANS-RXN', '3-<br>OCTAPRENYL-4-OHBENZOATE-DECARBOX-RXN', '2.5.1.19-RXN', 'SHIKIMATE-<br>5-DEHYDROGENASE-RXN', 'RXN-7968-SHIKIMATE/NAD',<br>'H2NEOPTERINALDOL-RXN', 'H2PTEROATESYNTH-RXN', 'PRAISOM-RXN',<br>'RXN0-2381', 'H2PTERIDINEPYROPHOSPHOKIN-RXN', 'DIHYDRONEOPTERIN-<br>MONO-P-DEPHOS-RXN', 'IGPSYN-RXN', 'RXN0-2382', 'H2NEOPTERINALDOL-<br>RXN', 'H2NEOPTERINP3PYROPHOSPHOHYDRO-RXN', 'TRYPTOPHAN--TRNA-<br>LIGASE-RXN', 'RXN0-2381', 'GTP-CYCLOHYDRO-I-RXN', 'DIHYDRONEOPTERIN-<br>MONO-P-DEPHOS-RXN' |
| f. | SHIKIMATE-KINASE-RXN         | 'RXN-7968-SHIKIMATE/NAD', 'SHIKIMATE-5-DEHYDROGENASE-RXN', '2.5.1.19-<br>RXN', 'SHIKIMATE-KINASE-RXN', 'CHORISMATE-SYNTHASE-RXN',<br>'ANTHRANSYN-RXN', 'CHORISMATEMUT-RXN', '2.5.1.19-RXN', 'PABASYN-RXN',<br>'CHORPYRLY-RXN', 'ISOCHORSYN-RXN', 'PREPHENATEDEHYDROG-RXN',<br>'PREPHENATEDEHYDRAT-RXN', 'ADCLY-RXN', '4OHBENZOATE-<br>OCTAPRENYLTRANSFER-RXN', '2.5.1.39-RXN', 'ISOCHORMAT-RXN',<br>'ORNITHINE--OXO-ACID-AMINOTRANSFERASE-RXN-L-ORNITHINE/P-<br>HYDROXY-PHENYLPYRUVATE', 'TYRAMINOTRANS-RXN', 'PABASYN-RXN',<br>'RXN-6142', 'H2PTEROATESYNTH-RXN', '3-OCTAPRENYL-4-OHBENZOATE-<br>DECARBOX-RXN', 'DHBDEHYD-RXN', 'ISOCHORSYN-RXN',<br>'DIHYDROFOLATESYNTH-RXN', 'H2PTERIDINEPYROPHOSPHOKIN-RXN',<br>'ENTMULTI-RXN', 'ISOCHORMAT-RXN', 'PRTRANS-RXN',<br>'H2NEOPTERINALDOL-RXN', 'H2PTEROATESYNTH-RXN', 'ANTHRANSYN-RXN',<br>'PRAISOM-RXN', 'H2PTERIDINEPYROPHOSPHOKIN-RXN',<br>'DIHYDRONEOPTERIN-MONO-P-DEPHOS-RXN', 'PRTRANS-RXN', 'IGPSYN-RXN',<br>'H2NEOPTERINALDOL-RXN', 'H2NEOPTERINP3PYROPHOSPHOHYDRO-RXN',<br>'PRAISOM-RXN', 'RXN0-2381', 'GTP-CYCLOHYDRO-I-RXN',<br>'DIHYDRONEOPTERIN-MONO-P-DEPHOS-RXN', 'IGPSYN-RXN', 'RXN0-2382',<br>'RXN0-2381', 'TRYPTOPHAN--TRNA-LIGASE-RXN'      |
| g. | ADENOSYLMOCYSTEINASE-<br>RXN | 'RXN-5761', 'RXN-5501', 'ADOMET-DMK-METHYLTRANSFER-RXN', '2.1.1.62-<br>RXN', '2.1.1.103-RXN', 'RXN-5762', '2.1.1.71-RXN', '2-OCTAPRENYL-METHOXY-<br>BENZOQ-METH-RXN', '2.1.1.77-RXN', 'RXN-3642', 'RXN-5642', 'RXN-5643', 'RXN1F-<br>28', '2.1.1.137-RXN', 'RXN-5763', 'DIPHTHINE-SYNTHASE-RXN', 'RXN-3645', '2-<br>OCTAPRENYL-6-OHPHENOL-METHY-RXN', '2.1.1.138-RXN', 'RXN-5502',<br>'MALATE-DEHYDROGENASE-ACCEPTOR-RXN-<br>MAL/DEMETHYLMENAQUINONE', 'RXN0-5260-<br>DEMETHYLMENAQUINONE/GLYCEROL-3P', 'DMK-RXN',<br>'DLACTDEHYDROGFAD-RXN-D-LACTATE/DEMETHYLMENAQUINONE', 'RXN-                                                                                                                                                                                                                                                                                                                                                                                                                                                                                                                                                                                                                               |

|  |                                                                                                                                                                                                                                                 |
|--|-------------------------------------------------------------------------------------------------------------------------------------------------------------------------------------------------------------------------------------------------|
|  | 5642', '2.7.7.57-RXN', 'RXN-5643', 'RXN4FS-3', 'RXN-745', 'RXN-9311', 'RXN1F-28', 'RXN-10708', 'RXN-744', 'NAPHTHOATE-SYN-RXN', 'DMK-RXN', 'RXN-9311', 'O-SUCCINYLBENZOATE-COA-LIG-RXN', 'NAPHTHOATE-SYN-RXN', 'O-SUCCINYLBENZOATE-COA-SYN-RXN' |
|--|-------------------------------------------------------------------------------------------------------------------------------------------------------------------------------------------------------------------------------------------------|

## Appendix B Supplementary material

The predicted essential reaction based on our analysis in the network are presented in table S3, of which most of this reactions were identified to be found in the gold standards or have been predicted to be essential to the network in previous study.

### Predicted essential reactions

**Table S3: All predicted essential reactions in the network used in this study.**

| REACTION                              | No. of knocked Reaction | Essentiality |
|---------------------------------------|-------------------------|--------------|
| SUPEROX-DISMUT-RXN                    | 94                      | 1.27027027   |
| CATAL-RXN                             | 74                      | 1            |
| S-ADENMETSYN-RXN                      | 49                      | 0.662162162  |
| 2.5.1.19-RXN                          | 48                      | 0.648648649  |
| CHORISMATE-SYNTHASE-RXN               | 48                      | 0.648648649  |
| SHIKIMATE-KINASE-RXN                  | 48                      | 0.648648649  |
| ADENOSYLHOMOCYSTEINASE-RXN            | 39                      | 0.527027027  |
| RXN-1321                              | 31                      | 0.418918919  |
| 12-OXOPHYTODIENOATE-REDUCTASE-RXN     | 30                      | 0.405405405  |
| ALLENE-OXIDE-CYCLASE-RXN              | 30                      | 0.405405405  |
| RXN1F-19                              | 30                      | 0.405405405  |
| IMPCYCLOHYDROLASE-RXN                 | 27                      | 0.364864865  |
| UDPKIN-RXN                            | 27                      | 0.364864865  |
| 2.6.1.18-RXN                          | 26                      | 0.351351351  |
| AICARTRANSFORM-RXN                    | 26                      | 0.351351351  |
| 3-HYDROXYPROPIONATE-DEHYDROGENASE-RXN | 25                      | 0.337837838  |
| PROPCOASYN-RXN                        | 25                      | 0.337837838  |
| RXN-6383                              | 25                      | 0.337837838  |
| RXN-6384                              | 25                      | 0.337837838  |
| DIAMINOPIMDECARB-RXN                  | 24                      | 0.324324324  |
| DIAMINOPIMEPIM-RXN                    | 24                      | 0.324324324  |
| SUCCDIAMINOPIMDESUCC-RXN              | 24                      | 0.324324324  |
| SUCCINYLDIAMINOPIMTRANS-RXN           | 24                      | 0.324324324  |
| TETHYDPICSUCC-RXN                     | 24                      | 0.324324324  |
| RXN-10695                             | 23                      | 0.310810811  |
| RXN-10701                             | 23                      | 0.310810811  |
| RXN-5472                              | 23                      | 0.310810811  |
| RXN-10696                             | 22                      | 0.297297297  |
| RXN-10697                             | 22                      | 0.297297297  |
| RXN-10698                             | 22                      | 0.297297297  |

|                                        |    |             |
|----------------------------------------|----|-------------|
| RXN-10699                              | 22 | 0.297297297 |
| RXN-10700                              | 22 | 0.297297297 |
| RXN-10702                              | 22 | 0.297297297 |
| RXN-10703                              | 22 | 0.297297297 |
| RXN-10704                              | 22 | 0.297297297 |
| RXN-10705                              | 22 | 0.297297297 |
| RXN-10706                              | 22 | 0.297297297 |
| RXN-10707                              | 22 | 0.297297297 |
| RXN-5466                               | 22 | 0.297297297 |
| RXN-5467                               | 22 | 0.297297297 |
| RXN-5468                               | 22 | 0.297297297 |
| RXN-5469                               | 22 | 0.297297297 |
| RXN-5470                               | 22 | 0.297297297 |
| RXN-5471                               | 22 | 0.297297297 |
| R601-RXN-FUM/REDUCED-MENAQUINONE       | 21 | 0.283783784 |
| ATPPHOSPHORIBOSYLTRANS-RXN             | 19 | 0.256756757 |
| HISTIDINE--TRNA-LIGASE-RXN             | 19 | 0.256756757 |
| 2.7.4.22-RXN                           | 18 | 0.243243243 |
| DIHYDROFOLATEREDUCT-RXN                | 18 | 0.243243243 |
| GLUTAMIDOTRANS-RXN                     | 18 | 0.243243243 |
| HISTALDEHYD-RXN                        | 18 | 0.243243243 |
| HISTAMINOTRANS-RXN                     | 18 | 0.243243243 |
| HISTCYCLOHYD-RXN                       | 18 | 0.243243243 |
| HISTIDPHOS-RXN                         | 18 | 0.243243243 |
| HISTOLDEHYD-RXN                        | 18 | 0.243243243 |
| HISTPRATPHYD-RXN                       | 18 | 0.243243243 |
| IMIDPHOSDEHYD-RXN                      | 18 | 0.243243243 |
| PRIBFAICARPISOM-RXN                    | 18 | 0.243243243 |
| URIDINEKIN-RXN                         | 17 | 0.22972973  |
| 3-HYDROXYISOBUTYRATE-DEHYDROGENASE-RXN | 16 | 0.216216216 |
| 3-HYDROXYISOBUTYRYL-COA-HYDROLASE-RXN  | 16 | 0.216216216 |
| MEPROPCOA-FAD-RXN                      | 16 | 0.216216216 |
| METHYLACYLYLCOA-HYDROXY-RXN            | 16 | 0.216216216 |
| RXN-1541                               | 15 | 0.202702703 |
| PABASYN-RXN                            | 14 | 0.189189189 |
| ADCLY-RXN                              | 13 | 0.175675676 |
| NAG1P-URIDYLTRANS-RXN                  | 13 | 0.175675676 |
| PROTOPORGENOXI-RXN                     | 13 | 0.175675676 |
| DIOHBUTANONEPSYN-RXN                   | 12 | 0.162162162 |
| NICONUCADENYLYLTRAN-RXN                | 12 | 0.162162162 |
| OHMETHYLBILANESYN-RXN                  | 12 | 0.162162162 |
| PORPHOBILSYNTH-RXN                     | 12 | 0.162162162 |

|                                     |    |             |
|-------------------------------------|----|-------------|
| RXN0-1461                           | 12 | 0.162162162 |
| RXN-3303                            | 12 | 0.162162162 |
| UROGENDECARBOX-RXN                  | 12 | 0.162162162 |
| UROGENIISYN-RXN                     | 12 | 0.162162162 |
| ADOMET-DMK-METHYLTRANSFER-RXN       | 11 | 0.148648649 |
| ANTHRANSYN-RXN                      | 11 | 0.148648649 |
| ARGSUCCINLYA-RXN                    | 11 | 0.148648649 |
| ARGSUCCINSYN-RXN                    | 11 | 0.148648649 |
| DIHYDROFOLATESYNTH-RXN              | 11 | 0.148648649 |
| GLUCIPURIDYLTRANS-RXN               | 11 | 0.148648649 |
| GTP-CYCLOHYDRO-I-RXN                | 11 | 0.148648649 |
| LUMAZINESYN-RXN                     | 11 | 0.148648649 |
| TRYPTOPHAN--TRNA-LIGASE-RXN         | 11 | 0.148648649 |
| 4.3.1.14-RXN                        | 10 | 0.135135135 |
| ACETYLGLUTKIN-RXN                   | 10 | 0.135135135 |
| ACETYLORNTRANSAM-RXN                | 10 | 0.135135135 |
| DIHYDRONEOPTERIN-MONO-P-DEPHOS-RXN  | 10 | 0.135135135 |
| H2NEOPTERINALDOL-RXN                | 10 | 0.135135135 |
| H2NEOPTERINP3PYROPHOSPHOHYDRO-RXN   | 10 | 0.135135135 |
| H2PTERIDINEPYROPHOSPHOKIN-RXN       | 10 | 0.135135135 |
| H2PTEROATESYNTH-RXN                 | 10 | 0.135135135 |
| IGPSYN-RXN                          | 10 | 0.135135135 |
| LYSINE-23-AMINOMUTASE-RXN           | 10 | 0.135135135 |
| N-ACETYLGLUTPREDUCT-RXN             | 10 | 0.135135135 |
| PRAISOM-RXN                         | 10 | 0.135135135 |
| PRTRANS-RXN                         | 10 | 0.135135135 |
| RXN0-2381                           | 10 | 0.135135135 |
| RXN0-2382                           | 10 | 0.135135135 |
| 1.4.1.11-RXN                        | 9  | 0.121621622 |
| 2.7.8.15-RXN                        | 9  | 0.121621622 |
| BETA-LYSINE-56-AMINOMUTASE-RXN      | 9  | 0.121621622 |
| BRANCHED-CHAINAMINOTRANSFERILEU-RXN | 9  | 0.121621622 |
| DTMPKI-RXN                          | 9  | 0.121621622 |
| MALSYN-RXN                          | 9  | 0.121621622 |
| METHYLACETOACETYLCOATHIOL-RXN       | 9  | 0.121621622 |
| R125-RXN                            | 9  | 0.121621622 |
| RXN-5464                            | 9  | 0.121621622 |
| SARCOX-RXN                          | 9  | 0.121621622 |
| SPONTPRO-RXN                        | 9  | 0.121621622 |
| 1.1.1.178-RXN                       | 8  | 0.108108108 |
| 2.4.1.141-RXN                       | 8  | 0.108108108 |
| 2.4.1.142-RXN                       | 8  | 0.108108108 |

|                                          |   |             |
|------------------------------------------|---|-------------|
| 2KETO-3METHYLVALERATE-RXN                | 8 | 0.108108108 |
| 2-MEBUCOA-FAD-RXN                        | 8 | 0.108108108 |
| AIRS-RXN                                 | 8 | 0.108108108 |
| FGAMSYN-RXN                              | 8 | 0.108108108 |
| RXN-5462                                 | 8 | 0.108108108 |
| RXN-5463                                 | 8 | 0.108108108 |
| SUCCSEMIALDDEHYDROG-RXN                  | 8 | 0.108108108 |
| TIGLYLCOA-HYDROXY-RXN                    | 8 | 0.108108108 |
| 2.7.7.15-RXN                             | 7 | 0.094594595 |
| ASPARTATEKIN-RXN                         | 7 | 0.094594595 |
| CDPDIGLYSYN-RXN                          | 7 | 0.094594595 |
| DEPHOSPHOCOAKIN-RXN                      | 7 | 0.094594595 |
| DIPHOSPHOMEVALONTE-DECARBOXYLASE-RXN     | 7 | 0.094594595 |
| DMK-RXN                                  | 7 | 0.094594595 |
| DXS-RXN                                  | 7 | 0.094594595 |
| HYDROXYMETHYLGLUTARYL-COA-SYNTHASE-RXN   | 7 | 0.094594595 |
| O-SUCCINYLBENZOATE-COA-SYN-RXN           | 7 | 0.094594595 |
| PANTOTHENATE-KIN-RXN                     | 7 | 0.094594595 |
| RXN0-302                                 | 7 | 0.094594595 |
| RXN-7163                                 | 7 | 0.094594595 |
| RXN-7202                                 | 7 | 0.094594595 |
| THI-P-KIN-RXN                            | 7 | 0.094594595 |
| TRANSALDOL-RXN                           | 7 | 0.094594595 |
| 1.1.1.34-RXN                             | 6 | 0.081081081 |
| 2.7.1.134-RXN                            | 6 | 0.081081081 |
| 2.7.1.148-RXN                            | 6 | 0.081081081 |
| 2.7.7.60-RXN                             | 6 | 0.081081081 |
| ASPARTATE-SEMIALDEHYDE-DEHYDROGENASE-RXN | 6 | 0.081081081 |
| DAHPSYN-RXN                              | 6 | 0.081081081 |
| DXPREDISOM-RXN                           | 6 | 0.081081081 |
| ETHANOLAMINE-KINASE-RXN                  | 6 | 0.081081081 |
| FRUCTOKINASE-RXN                         | 6 | 0.081081081 |
| MEVALONATE-KINASE-RXN                    | 6 | 0.081081081 |
| NAPHTHOATE-SYN-RXN                       | 6 | 0.081081081 |
| O-SUCCINYLBENZOATE-COA-LIG-RXN           | 6 | 0.081081081 |
| PANTEPADENYLTRAN-RXN                     | 6 | 0.081081081 |
| PHOSPHOMEVALONATE-KINASE-RXN             | 6 | 0.081081081 |
| P-PANTOCYSDECARB-RXN                     | 6 | 0.081081081 |
| P-PANTOCYSLIG-RXN                        | 6 | 0.081081081 |
| RXN-1685                                 | 6 | 0.081081081 |
| RXN-5781                                 | 6 | 0.081081081 |
| RXN-7141                                 | 6 | 0.081081081 |



|                                     |   |             |
|-------------------------------------|---|-------------|
| RXN-7203                            | 6 | 0.081081081 |
| RXN-7204                            | 6 | 0.081081081 |
| RXN-9311                            | 6 | 0.081081081 |
| SUCROSE-PHOSPHATE-SYNTHASE-RXN      | 6 | 0.081081081 |
| THIAZOLSYN3-RXN                     | 6 | 0.081081081 |
| UREASE-RXN                          | 6 | 0.081081081 |
| 1-ACYLGLYCEROL-3-P-ACYLTRANSFER-RXN | 5 | 0.067567568 |
| 3-DEHYDROQUINATE-DEHYDRATASE-RXN    | 5 | 0.067567568 |
| 3-DEHYDROQUINATE-SYNTHASE-RXN       | 5 | 0.067567568 |
| AICARSYN-RXN                        | 5 | 0.067567568 |
| CITRAMALATE-LYASE-RXN               | 5 | 0.067567568 |
| DEOXYRIBOSE-P-ALD-RXN               | 5 | 0.067567568 |
| ENTMULTI-RXN                        | 5 | 0.067567568 |
| GABATRANSAM-RXN                     | 5 | 0.067567568 |
| GLUTACONYL-COA-DECARBOXYLASE-RXN    | 5 | 0.067567568 |
| GLYCEROL-KIN-RXN                    | 5 | 0.067567568 |
| GTP-CYCLOHYDRO-II-RXN               | 5 | 0.067567568 |
| ISOCHORSYN-RXN                      | 5 | 0.067567568 |
| METHYLASPARTATE-MUTASE-RXN          | 5 | 0.067567568 |
| PHOSPHAGLYPSYN-RXN                  | 5 | 0.067567568 |
| PYRIMSYN3-RXN                       | 5 | 0.067567568 |
| RIBOPHOSPHAT-RXN                    | 5 | 0.067567568 |
| RXN-10462                           | 5 | 0.067567568 |
| RXN-1461                            | 5 | 0.067567568 |
| RXN-1884                            | 5 | 0.067567568 |
| SUCROSE-PHOSPHATASE-RXN             | 5 | 0.067567568 |
| THI-P-SYN-RXN                       | 5 | 0.067567568 |
| THYMIDYLATESYN-RXN                  | 5 | 0.067567568 |
| 2.1.1.103-RXN                       | 4 | 0.054054054 |
| ASPCARBTRANS-RXN                    | 4 | 0.054054054 |
| CARDIOLIPSYN-RXN                    | 4 | 0.054054054 |
| CHOLINE-KINASE-RXN                  | 4 | 0.054054054 |
| CHORISMATEMUT-RXN                   | 4 | 0.054054054 |
| DHBDEHYD-RXN                        | 4 | 0.054054054 |
| D-PPENTOMUT-RXN                     | 4 | 0.054054054 |
| GPPSYN-RXN                          | 4 | 0.054054054 |
| ISOCHORMAT-RXN                      | 4 | 0.054054054 |
| MALONYL-ACPDECARBOX-RXN             | 4 | 0.054054054 |
| MANNPISOM-RXN                       | 4 | 0.054054054 |
| METHYLASPARTATE-AMMONIA-LYASE-RXN   | 4 | 0.054054054 |
| NICOTINATEPRIBOSYLTRANS-RXN         | 4 | 0.054054054 |
| OHACYL-COA-DEHYDROG-RXN             | 4 | 0.054054054 |

|                                   |   |             |
|-----------------------------------|---|-------------|
| OROTPDECARB-RXN                   | 4 | 0.054054054 |
| PGPPHOSPHA-RXN                    | 4 | 0.054054054 |
| PRPPAMIDOTRANS-RXN                | 4 | 0.054054054 |
| RIBOFLAVINSYNDEAM-RXN             | 4 | 0.054054054 |
| RIBOFLAVINSYNREDUC-RXN            | 4 | 0.054054054 |
| RXN0-3901                         | 4 | 0.054054054 |
| RXN-11213                         | 4 | 0.054054054 |
| RXN1F-28                          | 4 | 0.054054054 |
| S-2-METHYLMALATE-DEHYDRATASE-RXN  | 4 | 0.054054054 |
| SAICARSYN-RXN                     | 4 | 0.054054054 |
| SAMDECARB-RXN                     | 4 | 0.054054054 |
| 3-OXOACYL-ACP-REDUCT-RXN          | 3 | 0.040540541 |
| 3-SULFINYL-PYRUVATE-SPON-RXN      | 3 | 0.040540541 |
| ACETATEKIN-RXN                    | 3 | 0.040540541 |
| ACNEULY-RXN                       | 3 | 0.040540541 |
| ARGDECARBOX-RXN                   | 3 | 0.040540541 |
| CHORPYRLY-RXN                     | 3 | 0.040540541 |
| CREATININE-DEAMINASE-RXN          | 3 | 0.040540541 |
| CYSTEINE-DIOXYGENASE-RXN          | 3 | 0.040540541 |
| DIHYDROOROT-RXN                   | 3 | 0.040540541 |
| DUTP-PYROP-RXN                    | 3 | 0.040540541 |
| ENOYL-ACP-REDUCT-NADH-RXN         | 3 | 0.040540541 |
| FADSYN-RXN                        | 3 | 0.040540541 |
| FPPSYN-RXN                        | 3 | 0.040540541 |
| GALACTOKIN-RXN                    | 3 | 0.040540541 |
| GDPMANDEHYDRA-RXN                 | 3 | 0.040540541 |
| GLUCDEHYDROG-RXN-GLC/UBIQUINONE-9 | 3 | 0.040540541 |
| GLUCONOKIN-RXN                    | 3 | 0.040540541 |
| GLYRIBONUCSYN-RXN                 | 3 | 0.040540541 |
| HOMOSERKIN-RXN                    | 3 | 0.040540541 |
| IMP-DEHYDROG-RXN                  | 3 | 0.040540541 |
| KETOGLUTREDUCT-RXN                | 3 | 0.040540541 |
| L-ASPARTATE-OXID-RXN              | 3 | 0.040540541 |
| MALONYL-COA-ACP-TRANSACYL-RXN     | 3 | 0.040540541 |
| NANE-RXN                          | 3 | 0.040540541 |
| N-CARBAMOYLSARCOSINE-AMIDASE-RXN  | 3 | 0.040540541 |
| NICOTINAMID-RXN                   | 3 | 0.040540541 |
| OROPRIBTRANS-RXN                  | 3 | 0.040540541 |
| PHOSMANMUT-RXN                    | 3 | 0.040540541 |
| QUINOPRIBOTRANS-RXN               | 3 | 0.040540541 |
| RIBOFLAVIN-SYN-RXN                | 3 | 0.040540541 |
| RXN0-2142                         | 3 | 0.040540541 |

|                                       |   |             |
|---------------------------------------|---|-------------|
| RXN0-2145                             | 3 | 0.040540541 |
| RXN0-3921                             | 3 | 0.040540541 |
| RXN-1083                              | 3 | 0.040540541 |
| RXN-1883                              | 3 | 0.040540541 |
| RXN-3761                              | 3 | 0.040540541 |
| RXN-5761                              | 3 | 0.040540541 |
| RXN-5763                              | 3 | 0.040540541 |
| RXN-745                               | 3 | 0.040540541 |
| RXN-7609                              | 3 | 0.040540541 |
| RXN-7682                              | 3 | 0.040540541 |
| RXN-7913                              | 3 | 0.040540541 |
| RXN-8889                              | 3 | 0.040540541 |
| RXN-9514                              | 3 | 0.040540541 |
| RXN-9518                              | 3 | 0.040540541 |
| RXN-9524                              | 3 | 0.040540541 |
| RXN-9532                              | 3 | 0.040540541 |
| RXN-9536                              | 3 | 0.040540541 |
| RXN-9540                              | 3 | 0.040540541 |
| RXN-9633                              | 3 | 0.040540541 |
| RXN-9635                              | 3 | 0.040540541 |
| RXN-9657                              | 3 | 0.040540541 |
| RXN-9658                              | 3 | 0.040540541 |
| RXN-9659                              | 3 | 0.040540541 |
| RXN-9661                              | 3 | 0.040540541 |
| RXN-9662                              | 3 | 0.040540541 |
| RXN-9663                              | 3 | 0.040540541 |
| RXNQ-4141                             | 3 | 0.040540541 |
| THREONINE--TRNA-LIGASE-RXN            | 3 | 0.040540541 |
| VINYLAACETYL-COA-DELTA-ISOMERASE-RXN  | 3 | 0.040540541 |
| 1.2.1.9-RXN                           | 2 | 0.027027027 |
| 2PGADEHYDRAT-RXN                      | 2 | 0.027027027 |
| 3.5.2.14-RXN                          | 2 | 0.027027027 |
| 3-HYDROXYDECANOYL-ACP-DEHYDR-RXN      | 2 | 0.027027027 |
| 3-SULFINOALANINE-AMINOTRANSFERASE-RXN | 2 | 0.027027027 |
| 4.2.1.58-RXN                          | 2 | 0.027027027 |
| 4.2.1.59-RXN                          | 2 | 0.027027027 |
| 4.2.1.61-RXN                          | 2 | 0.027027027 |
| ADENPRIBOSYLTRAN-RXN                  | 2 | 0.027027027 |
| CITSYN-RXN                            | 2 | 0.027027027 |
| DIHYDRODIPICSYN-RXN                   | 2 | 0.027027027 |
| ENOYL-COA-HYDRAT-RXN                  | 2 | 0.027027027 |
| GALACTURIDYLTRAN-RXN                  | 2 | 0.027027027 |

|                                        |   |             |
|----------------------------------------|---|-------------|
| GLUCONOLACT-RXN                        | 2 | 0.027027027 |
| NANK-RXN                               | 2 | 0.027027027 |
| NITRATE-REDUCTASE-NADH-RXN             | 2 | 0.027027027 |
| PHENYLPYRUVATE-DECARBOXYLASE-RXN       | 2 | 0.027027027 |
| PHOSPHASERDECARB-RXN                   | 2 | 0.027027027 |
| PREPHENATEDEHYDROG-RXN                 | 2 | 0.027027027 |
| PROLINE--TRNA-LIGASE-RXN               | 2 | 0.027027027 |
| QUINOLINATE-SYNTHA-RXN                 | 2 | 0.027027027 |
| RIBOFLAVINKIN-RXN                      | 2 | 0.027027027 |
| RXN0-2144                              | 2 | 0.027027027 |
| RXN0-3942                              | 2 | 0.027027027 |
| RXN-1082                               | 2 | 0.027027027 |
| RXN-5642                               | 2 | 0.027027027 |
| RXN-5762                               | 2 | 0.027027027 |
| RXN-8890                               | 2 | 0.027027027 |
| RXN-9520                               | 2 | 0.027027027 |
| RXN-9528                               | 2 | 0.027027027 |
| RXN-9533                               | 2 | 0.027027027 |
| RXN-9537                               | 2 | 0.027027027 |
| RXN-9634                               | 2 | 0.027027027 |
| THRESYN-RXN                            | 2 | 0.027027027 |
| TYROSINE--TRNA-LIGASE-RXN              | 2 | 0.027027027 |
| 1.2.1.25-RXN                           | 1 | 0.013513514 |
| 2.1.3.9-RXN                            | 1 | 0.013513514 |
| 2.3.1.168-RXN                          | 1 | 0.013513514 |
| 2.3.1.43-RXN                           | 1 | 0.013513514 |
| 2.3.1.80-RXN                           | 1 | 0.013513514 |
| 2.6.1.30-RXN                           | 1 | 0.013513514 |
| 3-DEHYDROSPHINGANINE-REDUCTASE-RXN     | 1 | 0.013513514 |
| 3-OCTAPRENYL-4-OHBENZOATE-DECARBOX-RXN | 1 | 0.013513514 |
| 4OHBENZOATE-OCTAPRENYLTRANSFER-RXN     | 1 | 0.013513514 |
| 6PGLUCONOLACT-RXN                      | 1 | 0.013513514 |
| ACONITATEDEHYDR-RXN                    | 1 | 0.013513514 |
| ACONITATEHYDR-RXN                      | 1 | 0.013513514 |
| ADENYLOSUCCINATE-SYNTHASE-RXN          | 1 | 0.013513514 |
| AGMATINE-DEIMINASE-RXN                 | 1 | 0.013513514 |
| AMINOBTDEHYDROG-RXN                    | 1 | 0.013513514 |
| AMPSYN-RXN                             | 1 | 0.013513514 |
| ASNSYNB-RXN                            | 1 | 0.013513514 |
| ASPARAGINE--TRNA-LIGASE-RXN            | 1 | 0.013513514 |
| BRANCHED-CHAINAMINOTRANSFERVAL-RXN     | 1 | 0.013513514 |
| BUTYRATE-KINASE-RXN                    | 1 | 0.013513514 |

|                                   |   |             |
|-----------------------------------|---|-------------|
| CREATINASE-RXN                    | 1 | 0.013513514 |
| CREATININASE-RXN                  | 1 | 0.013513514 |
| CYTIDEAM-RXN                      | 1 | 0.013513514 |
| DCDPKIN-RXN                       | 1 | 0.013513514 |
| DCTP-DEAM-RXN                     | 1 | 0.013513514 |
| GLU6PDEHYDROG-RXN                 | 1 | 0.013513514 |
| GLUTAMINESYN-RXN                  | 1 | 0.013513514 |
| GLUTATHIONE-SYN-RXN               | 1 | 0.013513514 |
| GLUTCYSLIG-RXN                    | 1 | 0.013513514 |
| GLUTKIN-RXN                       | 1 | 0.013513514 |
| GLUTRNAREDUCT-RXN                 | 1 | 0.013513514 |
| GLUTSEMIALDEHYDROG-RXN            | 1 | 0.013513514 |
| GLYOXIII-RXN                      | 1 | 0.013513514 |
| GLYOXI-RXN                        | 1 | 0.013513514 |
| GSAAMINOTRANS-RXN                 | 1 | 0.013513514 |
| HOMSUCTRAN-RXN                    | 1 | 0.013513514 |
| KDPGALDOL-RXN                     | 1 | 0.013513514 |
| LYSDECARBOX-RXN                   | 1 | 0.013513514 |
| LYSOPHOSPHOLIPASE-RXN             | 1 | 0.013513514 |
| MALATE--COA-LIGASE-RXN            | 1 | 0.013513514 |
| MALYL-COA-LYASE-RXN               | 1 | 0.013513514 |
| N-CARBAMOYLPUTRESCINE-AMIDASE-RXN | 1 | 0.013513514 |
| O-SUCCHOMOSERLYASE-RXN            | 1 | 0.013513514 |
| PGLUCONDEHYDRAT-RXN               | 1 | 0.013513514 |
| PHOSPHATE-BUTYRYLTRANSFERASE-RXN  | 1 | 0.013513514 |
| PHOSPHOLIPASE-A1-RXN              | 1 | 0.013513514 |
| PMPOXI-RXN                        | 1 | 0.013513514 |
| PNKIN-RXN                         | 1 | 0.013513514 |
| PNPOXI-RXN                        | 1 | 0.013513514 |
| PUTTRANSAM-RXN                    | 1 | 0.013513514 |
| PYRAMKIN-RXN                      | 1 | 0.013513514 |
| PYRIDOXKIN-RXN                    | 1 | 0.013513514 |
| R10-RXN                           | 1 | 0.013513514 |
| R12-RXN                           | 1 | 0.013513514 |
| R222-RXN                          | 1 | 0.013513514 |
| R223-RXN                          | 1 | 0.013513514 |
| RXN0-1132                         | 1 | 0.013513514 |
| RXN0-1133                         | 1 | 0.013513514 |
| RXN0-1147                         | 1 | 0.013513514 |
| RXN0-1401                         | 1 | 0.013513514 |
| RXN0-1402                         | 1 | 0.013513514 |
| RXN0-5217                         | 1 | 0.013513514 |

|                                   |   |             |
|-----------------------------------|---|-------------|
| RXN0-742                          | 1 | 0.013513514 |
| RXN0-743                          | 1 | 0.013513514 |
| RXN-34                            | 1 | 0.013513514 |
| RXN-35                            | 1 | 0.013513514 |
| RXN-5501                          | 1 | 0.013513514 |
| RXN-5502                          | 1 | 0.013513514 |
| RXN-5901                          | 1 | 0.013513514 |
| RXN-6601                          | 1 | 0.013513514 |
| RXN-6622                          | 1 | 0.013513514 |
| RXN-6642                          | 1 | 0.013513514 |
| RXN-7224                          | 1 | 0.013513514 |
| RXN-7225                          | 1 | 0.013513514 |
| RXN-7226                          | 1 | 0.013513514 |
| RXN-7227                          | 1 | 0.013513514 |
| RXN-7716                          | 1 | 0.013513514 |
| RXN-7719                          | 1 | 0.013513514 |
| RXN-7771                          | 1 | 0.013513514 |
| RXN-7772                          | 1 | 0.013513514 |
| RXN-7801                          | 1 | 0.013513514 |
| RXN-7933                          | 1 | 0.013513514 |
| SERINE-C-PALMITOYLTRANSFERASE-RXN | 1 | 0.013513514 |
| SPERMIDINESYN-RXN                 | 1 | 0.013513514 |
| SPERMINE-SYNTHASE-RXN             | 1 | 0.013513514 |
| URA-PHOSPH-RXN-DEOXYURIDINE/Pi    | 1 | 0.013513514 |

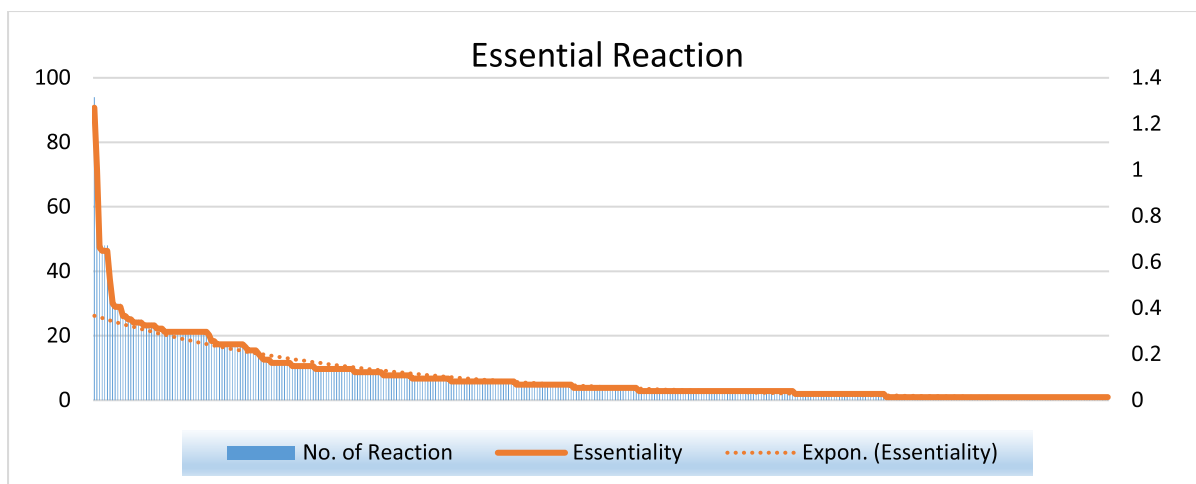

**Figure S1:** Graph to show No. of reactions considered and essentiality of reactions

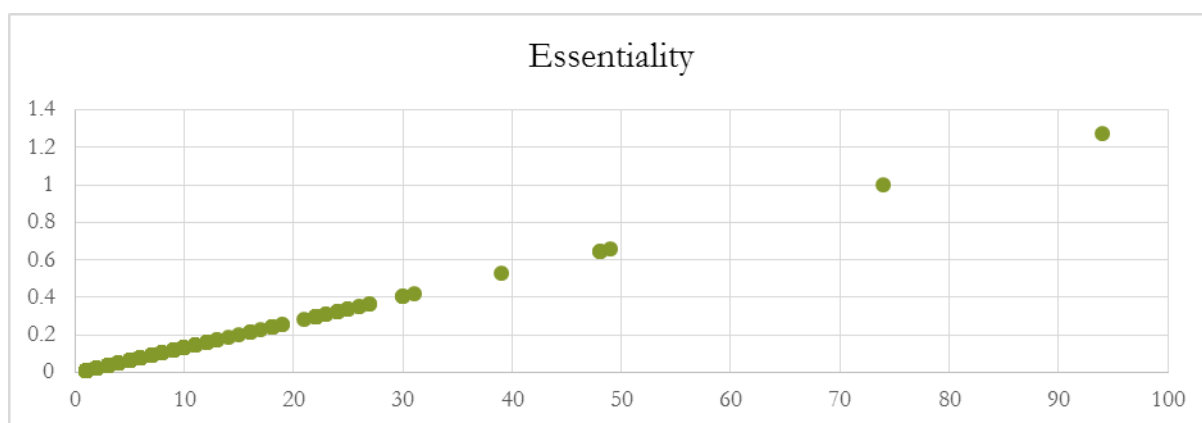

**Figure S2:** Graph to represent essentiality of reaction

## References

- [71] S. D. M. Sumanadasa *et al.*, “Antimalarial activity of the anticancer histone deacetylase inhibitor SB939.,” *Antimicrob. Agents Chemother.*, vol. 56, no. 7, pp. 3849–56, Jul. 2012.
- [72] H. K. Webster and J. M. Whaun, “Antimalarial properties of bredinin. Prediction based on identification of differences in human host-parasite purine metabolism.,” *J. Clin. Invest.*, vol. 70, no. 2, pp. 461–9, Aug. 1982.
- [73] M. B. Cassera, E. F. Merino, V. J. Peres, E. A. Kimura, G. Wunderlich, and A. M. Katzin, “Effect of fosmidomycin on metabolic and transcript profiles of the methylerythritol phosphate pathway in *Plasmodium falciparum*.,” *Memórias do Inst. Oswaldo Cruz*, vol. 102, no. 3, pp. 377–384, Jun. 2007.
- [74] H. Jomaa *et al.*, “Inhibitors of the Nonmevalonate Pathway of Isoprenoid Biosynthesis as Antimalarial Drugs,” *Science (80-. )*, vol. 285, no. 5433, 1999.

- [75] A. R. Odom and W. C. Van Voorhis, "Functional genetic analysis of the *Plasmodium falciparum* deoxyxylulose 5-phosphate reductoisomerase gene," *Mol. Biochem. Parasitol.*, vol. 170, no. 2, pp. 108–111, Apr. 2010.
- [76] V. Razakantoanina, N. K. P. Phung, and G. Jaureguiberry, "Antimalarial activity of new gossypol derivatives," *Parasitol. Res.*, vol. 86, no. 8, pp. 665–668, Jul. 2000.
- [77] L. Vivas *et al.*, "*Plasmodium falciparum*: Stage specific effects of a selective inhibitor of lactate dehydrogenase," *Exp. Parasitol.*, vol. 111, no. 2, pp. 105–114, Oct. 2005.
- [78] G. A. Biagini *et al.*, "Generation of quinolone antimalarials targeting the *Plasmodium falciparum* mitochondrial respiratory chain for the treatment and prophylaxis of malaria," *Proc. Natl. Acad. Sci. U. S. A.*, vol. 109, no. 21, pp. 8298–303, May 2012.
- [79] L. Soulère *et al.*, "Screening of *Plasmodium falciparum* iron superoxide dismutase inhibitors and accuracy of the SOD-assays," *Bioorg. Med. Chem.*, vol. 11, no. 23, pp. 4941–4944, Nov. 2003.
- [80] S. Vinayak and Y. D. Sharma, "Inhibition of *Plasmodium falciparum* *ispH* (*lytB*) Gene Expression by Hammerhead Ribozyme," *Oligonucleotides*, vol. 17, no. 2, pp. 189–200, Jun. 2007.
- [81] D. Chakrabarti, S. M. Schuster, and R. Chakrabarti, "Cloning and characterization of subunit genes of ribonucleotide reductase, a cell-cycle-regulated enzyme, from *Plasmodium falciparum*," *Proc. Natl. Acad. Sci.*, vol. 90, no. 24, pp. 12020–12024, 1993.
- [82] J. B. Munro and J. C. Silva, "Ribonucleotide reductase as a target to control apicomplexan diseases," *Curr. Issues Mol. Biol.*, vol. 14, no. 1, pp. 9–26, 2012.
- [83] K. S. Lau, A. J. L. Cooper, and D. T. Chuang, "Inhibition of the bovine branched-chain 2-oxo acid dehydrogenase complex and its kinase by arylidenepyruvates," *Biochim. Biophys. Acta - Protein Struct. Mol. Enzymol.*, vol. 1038, no. 3, pp. 360–366, May 1990.
- [84] A. M. Vaughan *et al.*, "Type II fatty acid synthesis is essential only for malaria parasite late liver stage development," *Cell. Microbiol.*, vol. 11, no. 3, pp. 506–520, Mar. 2009.
- [85] M. Yu *et al.*, "The Fatty Acid Biosynthesis Enzyme FabI Plays a Key Role in the Development of Liver-Stage Malarial Parasites," *Cell Host Microbe*, vol. 4, no. 6, pp. 567–578, Dec. 2008.
- [86] J. Baldwin *et al.*, "High-throughput screening for potent and selective inhibitors of *Plasmodium falciparum* dihydroorotate dehydrogenase," *J. Biol. Chem.*, vol. 280, no. 23, pp. 21847–53, Jun. 2005.
- [87] A. N. Boa, S. P. Canavan, P. R. Hirst, C. Ramsey, A. M. W. Stead, and G. A. McConkey, "Synthesis of brequinar analogue inhibitors of malaria parasite dihydroorotate dehydrogenase," *Bioorg. Med. Chem.*, vol. 13, no. 6, pp. 1945–1967, 2005.
- [88] T. Heikkilä *et al.*, "The first de novo designed inhibitors of *Plasmodium falciparum* dihydroorotate dehydrogenase," 2006.
- [89] L. McRobert and G. A. McConkey, "RNA interference (RNAi) inhibits growth of *Plasmodium falciparum*," *Mol. Biochem. Parasitol.*, vol. 119, no. 2, pp. 273–278, Feb. 2002.



- [90] X. Deng *et al.*, “Structural plasticity of malaria dihydroorotate dehydrogenase allows selective binding of diverse chemical scaffolds.,” *J. Biol. Chem.*, vol. 284, no. 39, pp. 26999–7009, Sep. 2009.
- [91] R. Gujjar *et al.*, “Lead Optimization of Aryl and Aralkyl Amine-Based Triazolopyrimidine Inhibitors of *Plasmodium falciparum* Dihydroorotate Dehydrogenase with Antimalarial Activity in Mice,” *J. Med. Chem.*, vol. 54, no. 11, pp. 3935–3949, Jun. 2011.
- [92] H. J. Painter, J. M. Morrissey, M. W. Mather, and A. B. Vaidya, “Specific role of mitochondrial electron transport in blood-stage *Plasmodium falciparum*,” *Nature*, vol. 446, no. 7131, pp. 88–91, Mar. 2007.
- [93] V. A. Nagaraj, R. Arumugam, D. Prasad, P. N. Rangarajan, and G. Padmanaban, “Protoporphyrinogen IX oxidase from *Plasmodium falciparum* is anaerobic and is localized to the mitochondrion,” *Mol. Biochem. Parasitol.*, vol. 174, no. 1, pp. 44–52, Nov. 2010.
- [94] T. N. C. Ramya, S. Mishra, K. Karmodiya, N. Surolia, and A. Surolia, “Inhibitors of nonhousekeeping functions of the apicoplast defy delayed death in *Plasmodium falciparum*.,” *Antimicrob. Agents Chemother.*, vol. 51, no. 1, pp. 307–16, Jan. 2007.
- [95] N. Suraveratum, S. R. Krungkrai, P. Leangaramgul, P. Prapunwattana, and J. Krungkrai, “Purification and characterization of *Plasmodium falciparum* succinate dehydrogenase,” *Mol. Biochem. Parasitol.*, vol. 105, no. 2, pp. 215–222, Feb. 2000.
- [96] J. Le Bras and R. Durand, “The mechanisms of resistance to antimalarial drugs in *Plasmodium falciparum*,” *Fundam. Clin. Pharmacol.*, vol. 17, no. 2, pp. 147–153, Apr. 2003.
- [97] L. Jiang, P. C. Lee, J. White, and P. K. Rathod, “Potent and selective activity of a combination of thymidine and 1843U89, a folate-based thymidylate synthase inhibitor, against *Plasmodium falciparum*.,” *Antimicrob. Agents Chemother.*, vol. 44, no. 4, pp. 1047–50, Apr. 2000.
- [98] K. M. Massimine *et al.*, “Eosin B as a novel antimalarial agent for drug-resistant *Plasmodium falciparum*.,” *Antimicrob. Agents Chemother.*, vol. 50, no. 9, pp. 3132–41, Sep. 2006.
- [99] J. Krungkrai, R. Kanchanarithsak, S. R. Krungkrai, and S. Rochanakij, “Mitochondrial NADH Dehydrogenase from *Plasmodium falciparum* and *Plasmodium berghei*,” *Exp. Parasitol.*, vol. 100, no. 1, pp. 54–61, Jan. 2002.
- [100] G. A. Biagini, P. Viriyavejakul, P. M. O’neill, P. G. Bray, and S. A. Ward, “Functional characterization and target validation of alternative complex I of *Plasmodium falciparum* mitochondria.,” *Antimicrob. Agents Chemother.*, vol. 50, no. 5, pp. 1841–51, May 2006.
- [101] S. A. Uyemura, S. Luo, M. Vieira, S. N. J. Moreno, and R. Docampo, “Oxidative phosphorylation and rotenone-insensitive malate- and NADH-quinone oxidoreductases in *Plasmodium yoelii yoelii* mitochondria in situ.,” *J. Biol. Chem.*, vol. 279, no. 1, pp. 385–93, Jan. 2004.
- [102] C. Biot, H. Bauer, R. H. Schirmer, and E. Davioud-Charvet, “5-Substituted tetrazoles as bioisosteres of carboxylic acids. Bioisosterism and mechanistic studies on glutathione

- reductase inhibitors as antimalarials,” *J. Med. Chem.*, vol. 47, no. 24, pp. 5972–5983, 2004.
- [103] P. Grellier, A. Marozienė, H. Nivinskas, J. Šarlauskas, A. Aliverti, and N. Čėnas, “Antiplasmodial activity of quinones: Roles of aziridinyl substituents and the inhibition of *Plasmodium falciparum* glutathione reductase,” *Arch. Biochem. Biophys.*, vol. 494, no. 1, pp. 32–39, Feb. 2010.
- [104] K. LÜERSEN, R. D. WALTER, and S. MÜLLER, “*Plasmodium falciparum*-infected red blood cells depend on a functional glutathione de novo synthesis attributable to an enhanced loss of glutathione,” *Biochem. J.*, vol. 346, no. 2, 2000.
- [105] Z. Ya, E. Hempelmann, and R. H. Schirmer, “Glutathione reductase inhibitors as potential antimalarial drugs,” *Biochem. Pharmacol.*, vol. 37, no. 5, pp. 855–860, Mar. 1988.
- [106] Z. Krnajski, T.-W. Gilberger, R. D. Walter, A. F. Cowman, and S. Müller, “Thioredoxin reductase is essential for the survival of *Plasmodium falciparum* erythrocytic stages.,” *J. Biol. Chem.*, vol. 277, no. 29, pp. 25970–5, Jul. 2002.
- [107] ‡,§ Rudi A. Baron, ‡ Yuri K. Peterson, ‡ James C. Otto, ‡ and Johannes Rudolph, and ‡,|| Patrick J. Casey\*, “Time-Dependent Inhibition of Isoprenylcysteine Carboxyl Methyltransferase by Indole-Based Small Molecules†,” 2006.
- [108] A. M. Winter-Vann *et al.*, “A small-molecule inhibitor of isoprenylcysteine carboxyl methyltransferase with antitumor activity in cancer cells.,” *Proc. Natl. Acad. Sci. U. S. A.*, vol. 102, no. 12, pp. 4336–41, Mar. 2005.
- [109] W. H. Witola, K. El Bissati, G. Pessi, C. Xie, P. D. Roepe, and C. Ben Mamoun, “Disruption of the *Plasmodium falciparum* PfPMT gene results in a complete loss of phosphatidylcholine biosynthesis via the serine-decarboxylase-phosphoethanolamine-methyltransferase pathway and severe growth and survival defects.,” *J. Biol. Chem.*, vol. 283, no. 41, pp. 27636–43, Oct. 2008.
- [110] E. Nduati, S. Hunt, E. M. Kamau, and A. Nzila, “2,4-diaminopteridine-based compounds as precursors for de novo synthesis of antifolates: a novel class of antimalarials.,” *Antimicrob. Agents Chemother.*, vol. 49, no. 9, pp. 3652–7, Sep. 2005.
- [111] A. Banerjee, N. Arora, and U. Murty, “Aspartate carbamoyltransferase of *Plasmodium falciparum* as a potential drug target for designing anti-malarial chemotherapeutic agents,” *Med. Chem. Res.*, 2012.
- [112] M. B. Cassera *et al.*, “The methylerythritol phosphate pathway is functionally active in all intraerythrocytic stages of *Plasmodium falciparum*.,” *J. Biol. Chem.*, vol. 279, no. 50, pp. 51749–59, Dec. 2004.
- [113] H. Ginsburg, “Progress in in silico functional genomics: the malaria Metabolic Pathways database,” *Trends Parasitol.*, vol. 22, no. 6, pp. 238–240, Jun. 2006.
- [114] O. Nicolas *et al.*, “Pharmacological properties of a new antimalarial bithiazolium salt, T3, and a corresponding prodrug, TE3.,” *Antimicrob. Agents Chemother.*, vol. 49, no. 9, pp. 3631–9, Sep. 2005.
- [115] T. C. Santiago, R. Zufferey, R. S. Mehra, R. A. Coleman, and C. Ben Mamoun, “The *Plasmodium falciparum* PfGatp is an endoplasmic reticulum membrane protein important for the initial step of malarial glycerolipid synthesis.,” *J. Biol. Chem.*, vol.

- 279, no. 10, pp. 9222–32, Mar. 2004.
- [116] P. Gerold and R. T. Schwarz, “Biosynthesis of glycosphingolipids de-novo by the human malaria parasite *Plasmodium falciparum*,” *Mol. Biochem. Parasitol.*, vol. 112, no. 1, pp. 29–37, Jan. 2001.
- [117] N. Surolia and G. Padmanaban, “De novo biosynthesis of heme offers a new chemotherapeutic target in the human malarial parasite,” *Biochem. Biophys. Res. Commun.*, vol. 187, no. 2, pp. 744–750, Sep. 1992.
- [118] S. VARADHARAJAN, S. DHANASEKARAN, Z. Q. BONDAY, P. N. RANGARAJAN, and G. PADMANABAN, “Involvement of  $\delta$ -aminolaevulinate synthase encoded by the parasite gene in de novo haem synthesis by *Plasmodium falciparum*,” *Biochem. J.*, vol. 367, no. 2, 2002.
- [119] R. F. Waller *et al.*, “A type II pathway for fatty acid biosynthesis presents drug targets in *Plasmodium falciparum*,” *Antimicrob. Agents Chemother.*, vol. 47, no. 1, pp. 297–301, Jan. 2003.
- [120] P. J. Lee *et al.*, “Targeting the Fatty Acid Biosynthesis Enzyme,  $\beta$ -Ketoacyl:Acyl Carrier Protein Synthase III (PfKASIII), in the Identification of Novel Antimalarial Agents,” *J. Med. Chem.*, vol. 52, no. 4, pp. 952–963, Feb. 2009.
- [121] R. F. Waller *et al.*, “Nuclear-encoded proteins target to the plastid in *Toxoplasma gondii* and *Plasmodium falciparum*,” *Proc. Natl. Acad. Sci. U. S. A.*, vol. 95, no. 21, pp. 12352–7, Oct. 1998.
- [122] G. A. Kicska, P. C. Tyler, G. B. Evans, R. H. Furneaux, V. L. Schramm, and K. Kim, “Purine-less death in *Plasmodium falciparum* induced by immucillin-H, a transition state analogue of purine nucleoside phosphorylase,” *J. Biol. Chem.*, vol. 277, no. 5, pp. 3226–31, Feb. 2002.
- [123] M. B. Cassera *et al.*, “*Plasmodium falciparum* Parasites Are Killed by a Transition State Analogue of Purine Nucleoside Phosphorylase in a Primate Animal Model,” *PLoS One*, vol. 6, no. 11, p. e26916, Nov. 2011.
- [124] S. R. Krungkrai *et al.*, “Human malaria parasite orotate phosphoribosyltransferase: functional expression, characterization of kinetic reaction mechanism and inhibition profile,” *Mol. Biochem. Parasitol.*, vol. 134, no. 2, pp. 245–255, 2004.
- [125] K. K. Seymour, S. D. Lyons, L. Phillips, K. H. Rieckmann, and R. I. Christopherson, “Cytotoxic Effects of Inhibitors of de Novo Pyrimidine Biosynthesis upon *Plasmodium falciparum*,” *Biochemistry*, vol. 33, no. 17, pp. 5268–5274, May 1994.
- [126] H. J. Khamis, P. S. Sarma, and A. K. Mandal, “Allopurinol as an additive to quinine in the treatment of acute complicated *falciparum* malaria,” *Am. J. Trop. Med. Hyg.*, vol. 58, no. 4, pp. 454–457, Apr. 1998.
- [127] P. A. Dawson, D. A. E. Cochran, B. T. Emmerson, and R. B. Gordon, “Inhibition of *Plasmodium falciparum* hypoxanthine-guanine phosphoribosyltransferase mRNA by antisense oligodeoxynucleotide sequence,” *Mol. Biochem. Parasitol.*, vol. 60, no. 1, pp. 153–156, Jul. 1993.
- [128] J. D. Artz *et al.*, “Molecular characterization of a novel geranylgeranyl pyrophosphate synthase from *Plasmodium* parasites,” *J. Biol. Chem.*, vol. 286, no. 5, pp. 3315–22, Feb. 2011.

- [129] T. Triglia, J. G. T. Menting, C. Wilson, and A. F. Cowman, "Mutations in dihydropteroate synthase are responsible for sulfone and sulfonamide resistance in *Plasmodium falciparum*," *Proc. Natl. Acad. Sci.*, vol. 94, no. 25, pp. 13944–13949, 1997.
- [130] N. Haider, M.-L. Eschbach, S. de S. Dias, T.-W. Gilberger, R. D. Walter, and K. Lüersen, "The spermidine synthase of the malaria parasite *Plasmodium falciparum*: Molecular and biochemical characterisation of the polyamine synthesis enzyme," *Mol. Biochem. Parasitol.*, vol. 142, no. 2, pp. 224–236, 2005.
- [131] K. Fritz-Wolf *et al.*, "X-ray structure of glutathione S-transferase from the malarial parasite *Plasmodium falciparum*," *Proc. Natl. Acad. Sci. U. S. A.*, vol. 100, no. 24, pp. 13821–6, Nov. 2003.
- [132] P. Harwaldt, S. Rahlfs, and K. Becker, "Glutathione S-Transferase of the Malarial Parasite *Plasmodium falciparum*: Characterization of a Potential Drug Target," *Biol. Chem.*, vol. 383, no. 5, pp. 821–830, Jan. 2002.
- [133] E. Liebau *et al.*, "The glutathione S-transferase from *Plasmodium falciparum*," *Mol. Biochem. Parasitol.*, vol. 124, no. 1, pp. 85–90, 2002.
- [134] M. Perbandt, C. Burmeister, R. D. Walter, C. Betzel, and E. Liebau, "Native and inhibited structure of a Mu class-related glutathione S-transferase from *Plasmodium falciparum*," *J. Biol. Chem.*, vol. 279, no. 2, pp. 1336–42, Jan. 2004.
- [135] R. McLeod *et al.*, "Evidence for the shikimate pathway in apicomplexan parasites," *Nature*, vol. 393, no. 6687, pp. 801–805, Jun. 1998.
- [136] D. Chakrabarti *et al.*, "Protein farnesyltransferase and protein prenylation in *Plasmodium falciparum*," *J. Biol. Chem.*, vol. 277, no. 44, pp. 42066–73, Nov. 2002.
- [137] S. Specht *et al.*, "The guanylhydrazone CNI-1493: an inhibitor with dual activity against malaria? inhibition of host cell pro-inflammatory cytokine release and parasitic deoxyhypusine synthase," *Parasitol. Res.*, vol. 102, no. 6, pp. 1177–1184, May 2008.
- [138] S. Fletcher *et al.*, "Potent, *Plasmodium*-Selective Farnesyltransferase Inhibitors That Arrest the Growth of Malaria Parasites: Structure–Activity Relationships of Ethylenediamine-Analogue Scaffolds and Homology Model Validation," *J. Med. Chem.*, vol. 51, no. 17, pp. 5176–5197, Sep. 2008.
- [139] M. L. Ancelin and H. J. Vial, "Quaternary ammonium compounds efficiently inhibit *Plasmodium falciparum* growth in vitro by impairment of choline transport," *Antimicrob. Agents Chemother.*, vol. 29, no. 5, pp. 814–20, May 1986.
- [140] V. Choubey *et al.*, "Inhibition of *Plasmodium falciparum* choline kinase by hexadecyltrimethylammonium bromide: a possible antimalarial mechanism," *Antimicrob. Agents Chemother.*, vol. 51, no. 2, pp. 696–706, Feb. 2007.
- [141] A. Crooke, A. Diez, P. J. Mason, and J. M. Bautista, "Transient silencing of *Plasmodium falciparum* bifunctional glucose-6-phosphate dehydrogenase-6-phosphogluconolactonase," *FEBS J.*, vol. 273, no. 7, pp. 1537–1546, Apr. 2006.
- [142] J. Preuss *et al.*, "Discovery of a *Plasmodium falciparum* Glucose-6-phosphate Dehydrogenase 6-phosphogluconolactonase Inhibitor (*R*, *Z*)-*N*-((1-Ethylpyrrolidin-2-yl)methyl)-2-(2-fluorobenzylidene)-3-oxo-3,4-dihydro-2 *H*-benzo[*b*][1,4]thiazine-6-carboxamide (ML276) That Reduces Parasite Growth in Vitro," *J. Med. Chem.*, vol.

55, no. 16, pp. 7262–7272, Aug. 2012.

- [143] R. Zidovetzki, I. W. Sherman, L. O'Brien, H. Kunze, and N. P. Gorkova, "Inhibition of *Plasmodium falciparum* Phospholipase A 2 by Chloroquine, Quinine, and Arteether," *J. Parasitol.*, vol. 79, no. 4, p. 565, Aug. 1993.
- [144] R. Ogwan'g, J. Mwangi, G. Gachihi, A. Nwachukwu, C. R. Roberts, and S. K. Martin, "Use of pharmacological agents to implicate a role for phosphoinositide hydrolysis products in malaria gamete formation," *Biochem. Pharmacol.*, vol. 46, no. 9, pp. 1601–1606, Nov. 1993.
- [145] K. Hanada *et al.*, "Plasmodium falciparum Phospholipase C Hydrolyzing Sphingomyelin and Lysocholinephospholipids Is a Possible Target for Malaria Chemotherapy," *J. Exp. Med.*, vol. 195, no. 1, 2001.
- [146] K. Yuasa *et al.*, "PfPDE1, a novel cGMP-specific phosphodiesterase from the human malaria parasite *Plasmodium falciparum*," *Biochem. J.*, vol. 392, no. 1, 2005.
- [147] C. J. Taylor, L. McRobert, and D. A. Baker, "Disruption of a *Plasmodium falciparum* cyclic nucleotide phosphodiesterase gene causes aberrant gametogenesis," *Mol. Microbiol.*, vol. 69, no. 1, pp. 110–118, Jul. 2008.
- [148] Y. Kitade, A. Kozaki, T. Gotoh, T. Miwa, M. Nakanishi, and C. Yatome, "Synthesis of S-adenosyl-L-homocysteine hydrolase inhibitors and their biological activities," *Nucleic Acids Symp. Ser.*, vol. 42, no. 1, pp. 25–26, Nov. 1999.
- [149] S. Shuto, N. Minakawa, S. Niizuma, H. S. Kim, Y. Wataya, and A. Matsuda, "New neplanocin analogues. 12. Alternative synthesis and antimalarial effect of (6???)-6??-C-methylneplanocin A, a potent AdoHcy hydrolase inhibitor," *J. Med. Chem.*, vol. 45, no. 3, pp. 748–751, 2002.
- [150] J. M. Bujnicki, S. T. Prigge, D. Caridha, and P. K. Chiang, "Structure, evolution, and inhibitor interaction of S-adenosyl-L-homocysteine hydrolase from *Plasmodium falciparum*," *Proteins Struct. Funct. Bioinforma.*, vol. 52, no. 4, pp. 624–632, Aug. 2003.
- [151] J. Krungkrai, S. R. Krungkrai, and K. Phakanont, "Antimalarial activity of orotate analogs that inhibit dihydroorotase and dihydroorotate dehydrogenase," *Biochem. Pharmacol.*, vol. 43, no. 6, pp. 1295–1301, Mar. 1992.
- [152] K. K. Seymour, A. E. T. Yeo, K. H. Rieckmann, and R. I. Christopherson, "dCTP levels are maintained in *Plasmodium falciparum* subjected to pyrimidine deficiency or excess," *Ann. Trop. Med. Parasitol.*, vol. 91, no. 6, pp. 603–609, Sep. 1997.
- [153] P. C. Tyler, E. A. Taylor, R. F. G. Fröhlich, and V. L. Schramm, "Synthesis of 5'-methylthio coformycins: Specific inhibitors for malarial adenosine deaminase," *J. Am. Chem. Soc.*, vol. 129, no. 21, pp. 6872–6879, 2007.
- [154] M.-C. Ho *et al.*, "Structural and Metabolic Specificity of Methylthio coformycin for Malarial Adenosine Deaminases," *Biochemistry*, vol. 48, no. 40, pp. 9618–9626, Oct. 2009.
- [155] A. GURANOWSKI, E. STARZYSKA, A. G. McLENNAN, J. BARANIAK, and W. J. STEC, "Adenosine-5'-O-phosphorylated and adenosine-5'-O-phosphorothioylated polyols as strong inhibitors of (symmetrical) and (asymmetrical) dinucleoside tetraphosphatases," *Biochem. J.*, vol. 373, no. 2, 2003.

- [156] B. J. Berger, "Antimalarial activities of aminoxy compounds.," *Antimicrob. Agents Chemother.*, vol. 44, no. 9, pp. 2540–2, Sep. 2000.
- [157] R. Das Gupta *et al.*, "3-Aminoxy-1-aminopropane and derivatives have an antiproliferative effect on cultured *Plasmodium falciparum* by decreasing intracellular polyamine concentrations.," *Antimicrob. Agents Chemother.*, vol. 49, no. 7, pp. 2857–64, Jul. 2005.
- [158] I. B. Muller, R. Das Gupta, K. Liersen, C. Wrenger, and R. D. Walter, "Assessing the polyamine metabolism of *Plasmodium falciparum* as chemotherapeutic target," *Mol. Biochem. Parasitol.*, vol. 160, no. 1, pp. 1–7, Jul. 2008.
- [159] §,¶,⊥ Sudaratana R. Krungkrai *et al.*, "A Novel Enzyme Complex of Orotate Phosphoribosyltransferase and Orotidine 5'-Monophosphate Decarboxylase in Human Malaria Parasite *Plasmodium falciparum*: Physical Association, Kinetics, and Inhibition Characterization†,‡," 2005.
- [160] H. SCOTT, A. GERO, and W. OSULLIVAN, "In vitro inhibition of *Plasmodium falciparum* by pyrazofurin, an inhibitor of pyrimidine biosynthesis de novo," *Mol. Biochem. Parasitol.*, vol. 18, no. 1, pp. 3–15, Jan. 1986.
- [161] L. Kotra *et al.*, "Inhibition of Orotidine 5-Monophosphate Decarboxylase and Its Therapeutic Potential," *Mini-Reviews Med. Chem.*, vol. 8, no. 3, pp. 239–247, Mar. 2008.
- [162] P. S. Wright, T. L. Byers, D. E. Cross-Doersen, P. P. McCann, and A. J. Bitonti, "Irreversible inhibition of S-adenosylmethionine decarboxylase in *Plasmodium falciparum*-infected erythrocytes: Growth inhibition in vitro," *Biochem. Pharmacol.*, vol. 41, no. 11, pp. 1713–1718, Jun. 1991.
- [163] T. N. C. Ramya, N. Surolia, and A. Surolia, "Polyamine synthesis and salvage pathways in the malaria parasite *Plasmodium falciparum*," *Biochem. Biophys. Res. Commun.*, vol. 348, no. 2, pp. 579–584, 2006.
- [164] C. Wanidworanun, R. L. Nagel, and H. L. Shear, "Antisense oligonucleotides targeting malarial aldolase inhibit the asexual erythrocytic stages of *Plasmodium falciparum*," *Mol. Biochem. Parasitol.*, vol. 102, no. 1, pp. 91–101, Jul. 1999.
- [165] S. Reungprapavut, S. R. Krungkrai, and J. Krungkrai, "*Plasmodium falciparum* Carbonic Anhydrase is a Possible Target for Malaria Chemotherapy," *J. Enzyme Inhib. Med. Chem.*, vol. 19, no. 3, pp. 249–256, Jan. 2004.
- [166] A. K. Ghosh, I. Coppens, H. Gårdsvoll, M. Ploug, and M. Jacobs-Lorena, "Plasmodium ookinetes coopt mammalian plasminogen to invade the mosquito midgut.," *Proc. Natl. Acad. Sci. U. S. A.*, vol. 108, no. 41, pp. 17153–8, Oct. 2011.
- [167] G. Padmanaban, Z. Q. Bonday, S. Dhanasekaran, and P. N. Rangarajan, "Import of host  $\Delta$ -aminolevulinic acid dehydratase into the malarial parasite: Identification of a new drug target," *Nat. Med.*, vol. 6, no. 8, pp. 898–903, Aug. 2000.
- [168] S. K. Sharma *et al.*, "Identification, characterization, and inhibition of *Plasmodium falciparum* beta-hydroxyacyl-acyl carrier protein dehydratase (FabZ).," *J. Biol. Chem.*, vol. 278, no. 46, pp. 45661–71, Nov. 2003.
- [169] V. Bulusu, B. Srinivasan, M. P. Bopanna, and H. Balaram, "Elucidation of the substrate specificity, kinetic and catalytic mechanism of adenylosuccinate lyase from *Plasmodium*

- falciparum,” *Biochim. Biophys. Acta - Proteins Proteomics*, vol. 1794, no. 4, pp. 642–654, Apr. 2009.
- [170] P. J. Thornalley, M. Strath, and R. J. M. Wilson, “Antimalarial activity in vitro of the glyoxalase I inhibitor diester, S-p-bromobenzylglutathione diethyl ester,” *Biochem. Pharmacol.*, vol. 47, no. 2, pp. 418–420, Jan. 1994.
- [171] M. Urscher, S. S. More, R. Alisch, R. Vince, and M. Deponter, “Tight-binding inhibitors efficiently inactivate both reaction centers of monomeric Plasmodium falciparum glyoxalase I,” *FEBS J.*, vol. 279, no. 14, pp. 2568–2578, Jul. 2012.
- [172] C. M. Crane *et al.*, “Fluorescent Inhibitors for IspF, an Enzyme in the Non-Mevalonate Pathway for Isoprenoid Biosynthesis and a Potential Target for Antimalarial Therapy,” *Angew. Chemie Int. Ed.*, vol. 45, no. 7, pp. 1069–1074, Feb. 2006.
- [173] R. H. Barker, V. Metelev, E. Rapaport, and P. Zamecnik, “Inhibition of Plasmodium falciparum malaria using antisense oligodeoxynucleotides,” *Proc. Natl. Acad. Sci.*, vol. 93, no. 1, pp. 514–518, 1996.
- [174] A. L. Bodley, J. N. Cumming, and T. A. Shapiro, “Effects of camptothecin, a topoisomerase I inhibitor, on Plasmodium falciparum,” *Biochem. Pharmacol.*, vol. 55, no. 5, pp. 709–711, Mar. 1998.
- [175] P. Chavalitsheewinkoon-Petmitr, G. Pongvilairat, S. Auparakkitanon, and P. Wilairat, “Gametocytocidal activity of pyronaridine and DNA topoisomerase II inhibitors against multidrug-resistant Plasmodium falciparum in vitro,” *Parasitol. Int.*, vol. 48, no. 4, pp. 275–280, Feb. 2000.
- [176] S. Gamage, N. Tepsiri, and P. Wilairat, “Synthesis and in vitro evaluation of 9-anilino-3, 6-diaminoacridines active against a multidrug-resistant strain of the malaria parasite Plasmodium falciparum,” *J. Med.*, 1994.
- [177] W. Noonpakdee, J. Pothikasikorn, W. Nimitsantiwong, and P. Wilairat, “Inhibition of Plasmodium falciparum proliferation in vitro by antisense oligodeoxynucleotides against malarial topoisomerase II,” *Biochem. Biophys. Res. Commun.*, vol. 302, no. 4, pp. 659–664, Mar. 2003.
- [178] B. Ruan *et al.*, “A unique hydrophobic cluster near the active site contributes to differences in borrelidin inhibition among threonyl-tRNA synthetases,” *J. Biol. Chem.*, vol. 280, no. 1, pp. 571–7, Jan. 2005.
- [179] S. Corvaisier, V. Bordeau, and B. Felden, “Inhibition of transfer messenger RNA aminoacylation and trans-translation by aminoglycoside antibiotics,” *J. Biol. Chem.*, vol. 278, no. 17, pp. 14788–97, Apr. 2003.
- [180] E. Salcedo, J. F. Cortese, C. V. Plowe, P. F. G. Sims, and J. E. Hyde, “A bifunctional dihydrofolate synthetase–folylpolyglutamate synthetase in Plasmodium falciparum identified by functional complementation in yeast and bacteria,” *Mol. Biochem. Parasitol.*, vol. 112, no. 2, pp. 239–252, 2001.
- [181] S. MEIERJOHANN, R. D. WALTER, and S. MÜLLER, “Regulation of intracellular glutathione levels in erythrocytes infected with chloroquine-sensitive and chloroquine-resistant Plasmodium falciparum,” *Biochem. J.*, vol. 368, no. 3, 2002.
- [182] D. F. . Platel, F. Mangou, and J. Tribouley-Duret, “Role of glutathione in the detoxification of ferriprotoporphyrin IX in chloroquine resistant Plasmodium berghei,”

- Mol. Biochem. Parasitol.*, vol. 98, no. 2, pp. 215–223, Jan. 1999.
- [183] M. V Flores, D. Atkins, D. Wade, W. J. O’Sullivan, and T. S. Stewart, “Inhibition of *Plasmodium falciparum* proliferation in vitro by ribozymes,” *J. Biol. Chem.*, vol. 272, no. 27, pp. 16940–5, Jul. 1997.
- [184] J. Raman, S. Mehrotra, R. P. Anand, and H. Balaram, “Unique kinetic mechanism of *Plasmodium falciparum* adenylosuccinate synthetase,” *Mol. Biochem. Parasitol.*, vol. 138, no. 1, pp. 1–8, Nov. 2004.
- [185] G. A. McConkey, “*Plasmodium falciparum*: Isolation and Characterisation of a Gene Encoding Protozoan GMP Synthase,” *Exp. Parasitol.*, vol. 94, no. 1, pp. 23–32, Jan. 2000.
- [186] S. Bazzani, A. Hoppe, and H.-G. Holz, “Network-based assessment of the selectivity of metabolic drug targets in *Plasmodium falciparum* with respect to human liver metabolism,” *BMC Syst. Biol.*, vol. 6, 2012.
